# Supplementary material for: Prevalence and clinical profile of microcephaly in South America pre-Zika, 2005-14: prevalence and case-control study
Source: PubMed Central journal article supplement — BMJ. 2017 Nov 21;359:j5018. doi: 10.1136/bmj.j5018 (PMC5696624; doi:10.1136/bmj.j5018), 2017-11-21
Supplement: orii039050.ww1.pdf [file orii039050.ww1.pdf]

**Supplementary table | Hospital code, country, region, university/non-university, period, total births, total microcephaly cases, total controls, % controls within municipality, % microcephaly within municipality**

| Country   | City            | Hospital Code | University Affiliation | Public / Private | Period analyzed | N Births | N microcephaly Cases | N Controls (non-malformed) | % Cases Within Municipality | % Controls Within Municipality | Lat    | Long   | Alt (in meters) |
|-----------|-----------------|---------------|------------------------|------------------|-----------------|----------|----------------------|----------------------------|-----------------------------|--------------------------------|--------|--------|-----------------|
| ARGENTINA | BUENOS AIRES    | 317           | University             | Public           | 2009-2014       | 8226     | 3                    | 347                        | 0.0                         | 19.3                           | -34.72 | -58.28 | 5               |
| ARGENTINA | BUENOS AIRES    | 318           | University             | Public           | 2005            | 7180     | 7                    | 229                        | 14.3                        | 100.0                          | -34.63 | -58.40 | 5               |
| ARGENTINA | BUENOS AIRES    | 322           |                        | Public           | 2005-2007       | 11032    | 3                    | 89                         | 66.7                        | 100.0                          | -34.65 | -58.52 | 5               |
| ARGENTINA | BUENOS AIRES    | 324           | University             | Private          | 2005-2007       | 2554     | 1                    | 67                         | 0.0                         | 100.0                          | -34.56 | -58.50 | 5               |
| ARGENTINA | BUENOS AIRES    | 330           | University             | Private          | 2005            | 908      | 0                    | 26                         | -                           | 100.0                          | -34.61 | -58.42 | 5               |
| ARGENTINA | BUENOS AIRES    | 332           |                        | Public           | 2005-2014       | 13644    | 1                    | 306                        | 100.0                       | 78.2                           | -34.57 | -58.45 | 5               |
| ARGENTINA | ISIDRO CASANOVA | 335           | University             | Public           | 2005-2007       | 4196     | 0                    | 93                         | -                           | 100.0                          | -34.71 | -58.59 | 5               |
| ARGENTINA | FLORENCIO VAREL | 336           |                        | Public           | 2005            | 709      | 0                    | 5                          | -                           | 100.0                          | -34.82 | -58.27 | 0               |
| ARGENTINA | LANUS           | 337           |                        | Public           | 2008-2009       | 4583     | 2                    | 54                         | 0.0                         | 100.0                          | -34.70 | -58.40 | 5               |
| ARGENTINA | GUALEGUAYCHU    | 403           |                        | Public           | 2005-2009       | 4542     | 0                    | 180                        | -                           | 88.1                           | -33.01 | -58.53 | 11              |
| ARGENTINA | ROSARIO         | 413           |                        | Public           | 2005-2012       | 32039    | 15                   | 805                        | 100.0                       | 98.5                           | -33.16 | -60.52 | 24              |
| ARGENTINA | LA PLATA        | 416           | University             | Private          | 2005-2014       | 11365    | 2                    | 233                        | 0.0                         | 83.2                           | -34.92 | -57.95 | 10              |
| ARGENTINA | BAHIA BLANCA    | 417           |                        | Private          | 2005-2006       | 1789     | 0                    | 29                         | -                           | 100.0                          | -38.72 | -62.26 | 5               |
| ARGENTINA | BAHIA BLANCA    | 418           | University             | Public           | 2005-2014       | 26225    | 6                    | 423                        | 50.0                        | 68.0                           | -38.74 | -62.22 | 5               |
| ARGENTINA | GENERAL PICO    | 419*          |                        | Public           | 2009            | 68       | 0                    | -                          | -                           | 100.0                          | -35.67 | -63.77 | 103             |
| ARGENTINA | TANDIL          | 421           |                        | Private          | 2005-2006       | 860      | 0                    | 21                         | -                           | 100.0                          | -37.32 | -59.13 | 180             |
| ARGENTINA | TANDIL          | 422           | University             | Public           | 2005-2006       | 1439     | 0                    | 14                         | -                           | 100.0                          | -37.31 | -59.14 | 180             |

|           |                |      |            |         |           |       |    |      |       |       |        |        |      |
|-----------|----------------|------|------------|---------|-----------|-------|----|------|-------|-------|--------|--------|------|
| ARGENTINA | BAHIA BLANCA   | 423  | University | Private | 2005-2008 | 1906  | 0  | 16   | -     | 100.0 | -38.73 | -62.23 | 5    |
| ARGENTINA | CORDOBA        | 506* | University | Private | 2005      | 190   | 0  | -    | -     | 100.0 | -31.43 | -64.19 | 387  |
| ARGENTINA | CORDOBA        | 510  |            | Public  | 2005-2010 | 33578 | 13 | 693  | 46.2  | 82.2  | -31.42 | -64.19 | 387  |
| ARGENTINA | MENDOZA        | 601  | University | Public  | 2005-2007 | 13446 | 1  | 295  | 0.0   | 100.0 | -32.87 | -69.14 | 757  |
| ARGENTINA | SAN MARTIN     | 605  |            | Public  | 2005      | 635   | 0  | 11   | -     | 100.0 | -33.08 | -68.47 | 651  |
| ARGENTINA | SAN LUIS       | 614  |            | Public  | 2005-2012 | 15959 | 2  | 387  | 100.0 | 68.9  | -33.30 | -66.34 | 708  |
| ARGENTINA | SAN LUIS       | 615  |            |         | 2005      | 427   | 0  | 2    | -     | 100.0 | -33.30 | -66.33 | 708  |
| ARGENTINA | VILLA MERCEDES | 617  | University | Public  | 2005      | 1099  | 0  | 12   | -     | 100.0 | -33.68 | -65.45 | 485  |
| ARGENTINA | POSADAS        | 704  |            | Public  | 2005-2009 | 17096 | 2  | 256  | 100.0 | 100.0 | -27.39 | -55.89 | 50   |
| ARGENTINA | SAN PEDRO      | 801* |            | Public  | 2009      | 382   | 0  | -    | -     | 100.0 | -33.68 | -59.66 | 450  |
| ARGENTINA | SAN MIGUEL     | 803  | University | Public  | 2005-2013 | 88796 | 36 | 1466 | 16.7  | 46.8  | -26.83 | -65.22 | 436  |
| ARGENTINA | LA RIOJA       | 809  | University | Public  | 2005-2006 | 2146  | 0  | 45   | -     | 100.0 | -29.16 | -67.48 | 497  |
| ARGENTINA | CATAMARCA      | 810  | University | Public  | 2005      | 1612  | 0  | 14   | -     | 100.0 | -28.47 | -65.78 | 543  |
| ARGENTINA | ESQUEL         | 906  |            | Public  | 2005      | 485   | 0  | 19   | -     | 100.0 | -42.92 | -71.32 | 533  |
| ARGENTINA | EL BOLSON      | 907  |            | Public  | 2005-2014 | 3323  | 1  | 54   | 100.0 | 100.0 | -41.95 | -71.53 | 250  |
| ARGENTINA | PUERTO MADRYN  | 908  |            | Public  | 2005-2009 | 3064  | 0  | 26   | -     | 100.0 | -42.76 | -65.04 | 10   |
| ARGENTINA | NEUQUEN        | 913  |            | Public  | 2005      | 1018  | 0  | 36   | -     | 100.0 | -38.95 | -68.06 | 330  |
| ARGENTINA | CRO RIVADAVIA  | 914  |            | Public  | 2005      | 250   | 0  | 3    | -     | 100.0 | -23.25 | -64.27 | 5    |
| BOLIVIA   | LA PAZ         | B01  | University | Public  | 2005-2014 | 39248 | 12 | 863  | 58.3  | 69.8  | -16.50 | -68.12 | 3600 |
| BOLIVIA   | LA PAZ         | B07  | University | Public  | 2005-2006 | 12642 | 2  | 245  | 100.0 | 100.0 | -16.52 | -68.15 | 3600 |
| BOLIVIA   | LA PAZ         | B08  | University | Private | 2005      | 80    | 0  | 1    | -     | 100.0 | -16.17 | -69.09 | 3600 |
| BOLIVIA   | LA PAZ         | B09  |            | Private | 2007      | 402   | 0  | 20   | -     | 100.0 | -16.50 | -68.11 | 3600 |
| BOLIVIA   | TARIJA         | B10  | University | Public  | 2005-2014 | 27950 | 4  | 421  | 50.0  | 62.8  | -21.52 | -64.73 | 1854 |

|        |                |      |            |         |           |       |    |      |       |       |        |        |     |
|--------|----------------|------|------------|---------|-----------|-------|----|------|-------|-------|--------|--------|-----|
| BRASIL | FLORIANOPOLIS  | A04  | University | Public  | 2005-2014 | 36215 | 6  | 838  | 66.7  | 50.7  | -27.60 | -48.55 | 24  |
| BRASIL | RIO DE JANEIRO | A05  |            | Public  | 2007-2014 | 9582  | 69 | 1959 | 49.3  | 67.7  | -22.94 | -43.17 | 5   |
| BRASIL | SAO PAULO      | A10  |            | Public  | 2005-2010 | 5553  | 0  | 63   | -     | 50.0  | -23.60 | -46.65 | 731 |
| BRASIL | GOV VALADARES  | A19  |            | Private | 2005      | 1103  | 0  | 6    | -     | 100.0 | -18.85 | -41.94 | 167 |
| BRASIL | PORTO ALEGRE   | A25  | University | Public  | 2005-2014 | 37404 | 11 | 1458 | 9.1   | 69.4  | -30.04 | -51.21 | 11  |
| BRASIL | CAMPINAS       | A33  | University | Public  | 2005-2011 | 17473 | 25 | 985  | 48.0  | 73.5  | -22.91 | -47.06 | 693 |
| BRASIL | BELO HORIZONTE | A39  | University | Public  | 2005-2014 | 25623 | 45 | 2816 | 46.7  | 77.8  | -19.93 | -43.93 | 850 |
| BRASIL | SALVADOR       | A47  | University | Public  | 2005-2009 | 12075 | 3  | 1523 | 33.3  | 94.0  | -12.97 | -38.50 | 5   |
| BRASIL | JUAZEIRO NORTE | A48  | University | Public  | 2010-2011 | 5062  | 0  | 5    | -     | 100.0 | -7.21  | -39.31 | 377 |
| BRASIL | CAMPINAS       | A49* |            | Private | 2005-2009 | 3401  | 0  | -    | -     | 100.0 | -22.90 | -47.07 | 693 |
| BRASIL | FLORIANOPOLIS  | A50  | University | Public  | 2005-2014 | 16107 | 5  | 337  | 20.0  | 79.0  | -27.60 | -48.55 | 24  |
| BRASIL | JOINVILLE      | A51  |            | Public  | 2005-2009 | 28289 | 1  | 655  | 100.0 | 100.0 | -26.30 | -48.85 | 123 |
| BRASIL | JOAO PESSOA    | A56  |            | Public  | 2005-2014 | 67249 | 71 | 3769 | 43.7  | 45.6  | -7.12  | -34.87 | 5   |
| BRASIL | MONTENEGRO     | A57  |            | Public  | 2005      | 78    | 0  | 1    | -     | 100.0 | -29.69 | -51.48 | 34  |
| BRASIL | PORTO ALEGRE   | A59  | University | Public  | 2005-2006 | 2889  | 7  | 141  | 28.6  | 100.0 | -30.03 | -51.21 | 10  |
| BRASIL | BELO HORIZONTE | A60  |            | Public  | 2005-2010 | 12694 | 2  | 610  | 50.0  | 75.0  | -19.90 | -43.95 | 850 |
| BRASIL | PORTO VELHO    | A61  | University | Public  | 2007-2008 | 726   | 2  | 98   | 50.0  | 100.0 | -8.74  | -63.89 | 88  |
| BRASIL | BELO HORIZONTE | A62  | University | Public  | 2006-2008 | 8575  | 1  | 422  | 100.0 | 100.0 | -19.93 | -43.93 | 850 |
| BRASIL | ANGRA DOS REIS | A64* |            | Private | 2009      | 560   | 0  | -    | -     | 100.0 | -23.01 | -44.31 | 6   |
| BRASIL | ANGRA DOS REIS | A65  |            | Private | 2009-2014 | 2762  | 0  | 38   | -     | 81.6  | -22.99 | -44.26 | 6   |
| BRASIL | CAMPO GRANDE   | A66  | University | Public  | 2009-2011 | 3997  | 1  | 63   | 100.0 | 96.4  | -23.72 | -46.58 | 532 |

|          |              |      |            |         |                        |       |    |      |       |       |        |        |      |
|----------|--------------|------|------------|---------|------------------------|-------|----|------|-------|-------|--------|--------|------|
| CHILE    | SANTIAGO     | 201  | University | Public  | 2005-2014              | 14476 | 10 | 1345 | 0.0   | 5.2   | -33.42 | -70.65 | 600  |
| CHILE    | SANTIAGO     | 206  | University | Private | 2005-2006              | 2568  | 3  | 139  | 33.3  | 100.0 | -33.44 | -70.64 | 600  |
| CHILE    | VINA DEL MAR | 211* | University | Public  | 2005-2007              | 1997  | 0  | -    | -     | 100.0 | -33.00 | -71.54 | 10   |
| CHILE    | RANCAGUA     | 217  |            | Public  | 2005-2014              | 40833 | 45 | 1641 | 44.4  | 43.0  | -34.16 | -70.76 | 500  |
| CHILE    | LINARES      | 219  |            | Public  | 2005-2014              | 24761 | 15 | 1176 | 60.0  | 44.4  | -35.84 | -71.59 | 178  |
| CHILE    | PUERTO MONTT | 220  | University | Public  | 2005-2014              | 34665 | 7  | 631  | 71.4  | 67.0  | -41.47 | -72.94 | 5    |
| CHILE    | SANTIAGO     | 221  | University | Public  | 2005                   | 4676  | 1  | 177  | 100.0 | 100.0 | -33.58 | -70.58 | 600  |
| CHILE    | SANTIAGO     | 223  | University | Public  | 2005                   | 1942  | 4  | 53   | 100.0 | 100.0 | -33.46 | -70.64 | 600  |
| CHILE    | TALCA        | 225  | University | Public  | 2005-2012              | 27443 | 4  | 817  | 75.0  | 57.1  | -35.43 | -71.65 | 102  |
| CHILE    | CAUQUENES    | 226  |            | Public  | 2005-2014, except 2007 | 4732  | 0  | 134  | -     | 73.8  | -35.97 | -72.33 | 135  |
| CHILE    | CURICO       | 227  |            | Public  | 2005-2014              | 34308 | 0  | 525  | -     | 57.6  | -34.99 | -71.24 | 214  |
| COLOMBIA | CARTAGENA    | G07  | University | Public  | 2011-2012              | 1411  | 2  | 144  | 50.0  | 100.0 | 10.41  | -75.51 | 5    |
| COLOMBIA | BOGOTA       | G11  | University | Private | 2005-2014              | 26985 | 23 | 1205 | 95.7  | 92.5  | 4.82   | -74.03 | 2600 |
| COLOMBIA | BOGOTA       | G12  | University | Private | 2005-2006              | 6900  | 1  | 108  | 0.0   | 100.0 | 4.57   | -74.10 | 2600 |
| COLOMBIA | MANIZALES    | G13  | University | Public  | 2005 and 2009-2011     | 5674  | 0  | 100  | -     | 57.9  | 5.06   | -75.50 | 2150 |
| COLOMBIA | UBATE        | G15  | University | Public  | 2005                   | 684   | 0  | 6    | -     | 100.0 | 5.31   | -73.82 | 2556 |
| COLOMBIA | BOGOTA       | G16  |            | Private | 2005-2009              | 8055  | 6  | 245  | 100.0 | 94.3  | 4.58   | -74.21 | 2600 |
| COLOMBIA | BOGOTA       | G17* |            |         | 2005                   | 204   | 0  | -    | -     | 100.0 | 4.74   | -74.02 | 0    |
| COLOMBIA | BOGOTA       | G18  |            | Private | 2005                   | 314   | 0  | 18   | -     | 100.0 | 4.62   | -74.10 | 2600 |
| COLOMBIA | CALI         | G19  |            | Public  | 2005-2014              | 58263 | 10 | 1011 | 50.0  | 74.2  | 3.43   | -76.54 | 757  |

|           |                |      |            |         |                |       |    |      |       |       |        |        |      |
|-----------|----------------|------|------------|---------|----------------|-------|----|------|-------|-------|--------|--------|------|
| COLOMBIA  | MANIZALES      | G20  | University | Public  | 2005-2009      | 6432  | 0  | 217  | -     | 49.3  | 5.09   | -75.53 | 2150 |
| COLOMBIA  | CHIQUINQUIRA   | G21  |            | Private | 2005           | 327   | 0  | 4    | -     | 100.0 | 5.61   | -73.83 | 2711 |
| ECUADOR   | QUITO          | E01  | University | Public  | 2005-2011      | 20566 | 7  | 663  | 100.0 | 93.3  | -0.21  | -78.50 | 2850 |
| ECUADOR   | CHONE          | E04  |            | Public  | 2005-2010      | 8805  | 0  | 133  | -     | 68.0  | -0.71  | -80.11 | 110  |
| ECUADOR   | BAHIA CARAQUEZ | E05* | University | Public  | 2005           | 175   | 0  | -    | -     | 100.0 | -0.62  | -80.43 | 6    |
| ECUADOR   | CANAR          | E06  | University | Public  | 2005-2007      | 858   | 4  | 90   | 0.0   | 100.0 | -2.57  | -78.94 | 3096 |
| ECUADOR   | CANAR          | E07  |            | Private | 2005-2006      | 365   | 2  | 19   | 0.0   | 100.0 | -2.56  | -78.94 | 3096 |
| ECUADOR   | PORTOVIEJO     | E08  | University | Public  | 2005-2007      | 7659  | 2  | 142  | 0.0   | 100.0 | -1.06  | -80.45 | 30   |
| ECUADOR   | LOJA           | E09  | University | Public  | 2005-2010      | 14895 | 2  | 208  | 100.0 | 71.4  | -4.01  | -79.20 | 2200 |
| ECUADOR   | IBARRA         | E10  | University | Public  | 2005-2009      | 18950 | 4  | 607  | 25.0  | 64.4  | 0.34   | -78.12 | 2620 |
| ECUADOR   | AZOGUES        | E11  | University | Public  | 2005-2007      | 2717  | 2  | 100  | 0.0   | 100.0 | -2.74  | -78.85 | 2883 |
| ECUADOR   | MACHALA        | E12  |            | Public  | 2005           | 2845  | 0  | 34   | -     | 100.0 | -3.26  | -79.95 | 6    |
| ECUADOR   | QUITO          | E13  | University | Public  | 2010           | 4000  | 0  | 28   | -     | 11.1  | -0.24  | -78.54 | 2850 |
| PARAGUAY  | ASUNCION       | D04  | University | Public  | 2010-2011      | 5237  | 1  | 54   | 0.0   | 36.0  | -25.27 | -57.58 | 77   |
| URUGUAY   | MONTEVIDEO     | 110  |            | Public  | 2005-2008      | 7631  | 0  | 194  | -     | 100.0 | -34.89 | -56.16 | 5    |
| URUGUAY   | MALDONADO      | 114  |            | Public  | 2005-2008      | 1922  | 0  | 13   | -     | 100.0 | -34.79 | -54.92 | 50   |
| VENEZUELA | MARACAIBO      | F01  | University | Public  | 2005-2006      | 15140 | 2  | 361  | 50.0  | 100.0 | 10.67  | -71.62 | 5    |
| VENEZUELA | CORO           | F02  | University | Public  | 2005-2014      | 54317 | 13 | 1462 | 15.4  | 47.0  | 11.40  | -69.68 | 16   |
| VENEZUELA | CIUDAD BOLIVAR | F05  | University | Public  | 2005-2007      | 9868  | 1  | 212  | 100.0 | 100.0 | 8.09   | -63.55 | 20   |
| VENEZUELA | MARACAIBO      | F07  | University | Public  | 2005-2007      | 5453  | 0  | 65   | -     | 100.0 | 10.65  | -71.71 | 10   |
| Brazil    | ARACAJU        | A63  | University |         | 2006 and 2009- | 6505  | 2  | 136  | 100.0 | 37.1  | -10.91 | -37.08 | 9    |

2012

|              |         |     |           |       |            |              |       |       |        |        |      |
|--------------|---------|-----|-----------|-------|------------|--------------|-------|-------|--------|--------|------|
| Peru         | LIMA    | C05 | 2012-2014 | 19881 | 6          | 214          | 100.0 | 100.0 | -12.08 | -77.04 | 113  |
| COLOMBIA     | CALI    | G22 | 2011-2014 | 18455 | 5          | 395          | 80.0  | 75.9  | 3.46   | -76.53 | 986  |
| COLOMBIA     | CALI    | G24 | 2011-2014 | 4767  | 4          | 254          | 50.0  | 73.9  | 3.37   | -76.53 | 973  |
| COLOMBIA     | CALI    | G25 | 2012-2014 | 9118  | 1          | 121          | 100.0 | 95.0  | 3.45   | -76.53 | 992  |
| COLOMBIA     | PEREIRA | G26 | 2012-2014 | 4896  | 1          | 233          | 0.0   | 84.5  | 4.81   | -75.68 | 1454 |
| <b>TOTAL</b> |         |     |           |       | <b>552</b> | <b>39027</b> |       |       |        |        |      |

\*Monitor hospitals do not collect non-malformed control data and are not included in case-control analyses.

Lat = latitude; Long = longitude; Alt = altitude
